# Supplementary material
Source: publisher site journal article supplement (https://www.dovepress.com/article/604287)
Supplement: Supplementary file 1 [file 604287%20Revised%20%2509Table%20S1.docx]

**Table S1**. List of qPCR primers used.

| **Genes (human)** | **Primers** | |
| --- | --- | --- |
| *GAPDH* | Forward (sequence 5’ to 3’) | ACAACTTTGGTATCGTGGAAGG |
| Reverse (sequence 5’ to 3’) | GCCATCACGCCACAGTTTC |
| *EGR1* | Forward (sequence 5’ to 3’) | ACCCCTCTGTCTACTATTAAGGC |
| Reverse (sequence 5’ to 3’) | TGGGACTGGTAGCTGGTATTG |
| *CEBPG* | Forward (sequence 5’ to 3’) | GAAAAAGAGCCGGTTGAAAAGC |
| Reverse (sequence 5’ to 3’) | ACTGTACGTTGTCTGCAAGGT |
| *CEBPA* | Forward (sequence 5’ to 3’) | TATAGGCTGGGCTTCCCCTT |
| Reverse (sequence 5’ to 3’) | AGCTTTCTGGTGTGACTCGG |
| *STAT3* | Forward (sequence 5’ to 3’) | ACCAGCAGTATAGCCGCTTC |
| Reverse (sequence 5’ to 3’) | GCCACAATCCGGGCAATCT |
| *CTNNB1* | Forward (sequence 5’ to 3’) | AGCTTCCAGACACGCTATCAT |
| Reverse (sequence 5’ to 3’) | CGGTACAACGAGCTGTTTCTAC |
| *NR3C1* | Forward (sequence 5’ to 3’) | ATAGCTCTGTTCCAGACTCAACT |
| Reverse (sequence 5’ to 3’) | TCCTGAAACCTGGTATTGCCT |
| *TP53* | Forward (sequence 5’ to 3’) | CAGCACATGACGGAGGTTGT |
| Reverse (sequence 5’ to 3’) | TCATCCAAATACTCCACACGC |
| *SP1* | Forward (sequence 5’ to 3’) | GTGGAGGCAACATCATTGCTG |
| Reverse (sequence 5’ to 3’) | GCCACTGGTACATTGGTCACAT |
| *STAT5A* | Forward (sequence 5’ to 3’) | GCAGAGTCCGTGACAGAGG |
| Reverse (sequence 5’ to 3’) | CCACAGGTAGGGACAGAGTCT |
